## SUPPLEMENTAL FILE

### The role of light in mediating the effects of ocean acidification on coral calcification

Aaron M Dufault<sup>1</sup>, Aaron Ninokawa<sup>2</sup>, Lorenzo Bramanti<sup>1</sup>, Vivian R Cumbo<sup>1</sup>, Tung-Yung Fan<sup>3,4</sup> and Peter J Edmunds<sup>1</sup>

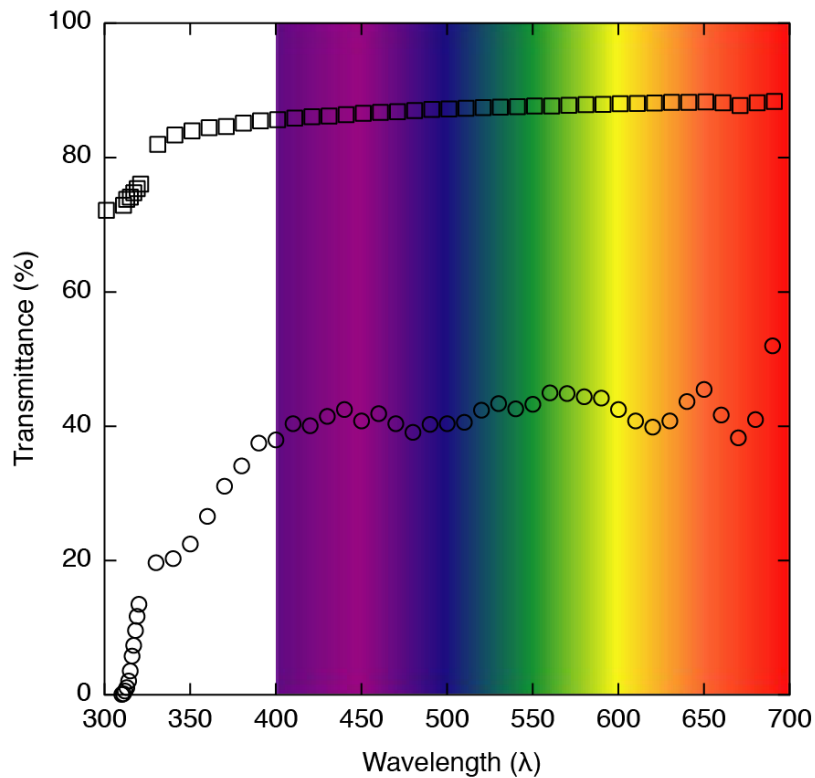

Fig. S1. Transmission characteristics of the ND filter (open squares) and clear plastic film (open circles) that were used to create light treatments in the experiment testing the effects of pCO<sub>2</sub> on the growth and survival of recruits of *Pocillopora damicornis*.
